# Supplementary material
Source: Springer Nature journal article supplement (https://www.springermedizin.de/resource/supplementary/13049_2011_290_MOESM7_ESM.pdf/9666272)

**Time to first physician (hh:mm)**

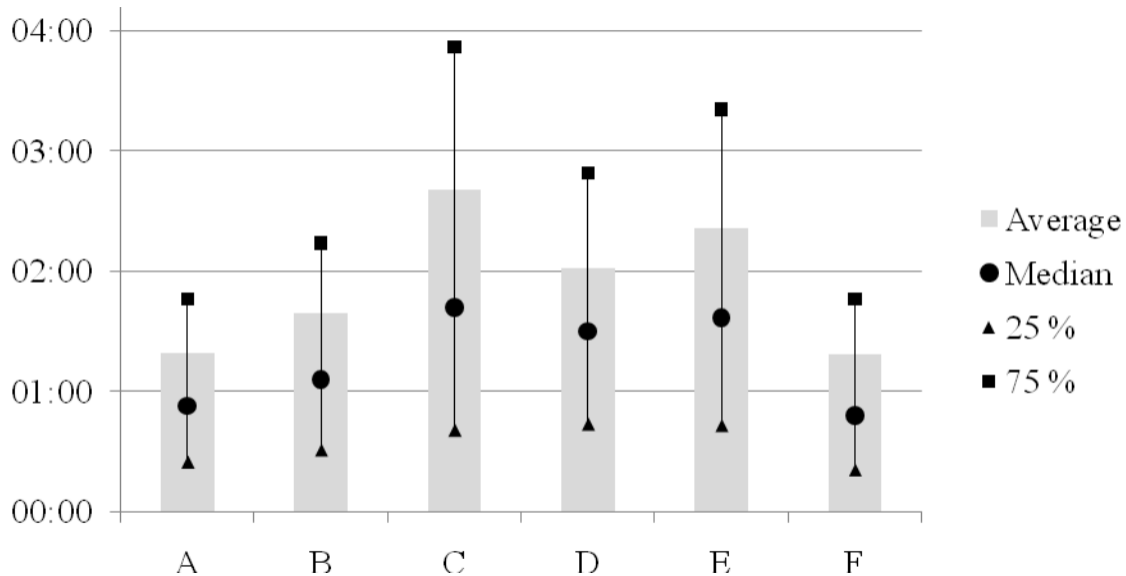

Supplement: MOESM7 [file 9666272]
